# Supplementary material for: An integrated pharmacokinetic study of Dengzhanxixin injection in rats by combination of multicomponent pharmacokinetics and anti-myocardial ischemic assay
Source: Royal Society of Chemistry journal article supplement (doi:10.1039/c9ra03917a), 2019-01-01
Supplement: c9ra03917a1.pdf [file c9ra03917a1.pdf]

## **An integrate pharmacokinetic study of Dengzhanxixin injection in rats by combination of multicomponent pharmacokinetics and anti-myocardial ischemic assay**

Jianyong Huang,<sup>†ab</sup> Ya Su,<sup>†b</sup> Chunlei Yang,<sup>b</sup> Shaoguang Li,<sup>b</sup> Youjia Wu,<sup>b</sup> Bing Chen,<sup>b</sup> Xinhua Lin,<sup>b</sup> Liying Huang,<sup>b</sup> Hong Yao,<sup>\*b</sup> and Peiying Shi<sup>\*c</sup>

<sup>a</sup>. Department of Pharmaceutical Science, Fujian Medical University Union Hospital, Fuzhou 350001, China.

<sup>b</sup>. Department of Pharmaceutical Analysis, School of Pharmacy, Fujian Medical University, Fuzhou 350122, China. Email: hongyao@mail.fjmu.edu.cn, or yauhung@126.com

<sup>c</sup>. Department of Traditional Chinese Medicine Resource and Bee Products, Bee Science College, Fujian Agriculture and Forestry University, Fuzhou, 350002, China. Email: peiyshi@126.com

<sup>†</sup> Both authors contributed equally to this work.

### **Supplementary Data**

**Table S1** The regression equation, linear range,  $r^2$ , LOD and LOQ of thirteen compounds

| Analyte                       | Regression equation<br>(ng/mL) | Linear range<br>(ng/mL) | $r^2$ | LOD<br>(ng/mL) | LOQ<br>(ng/mL) |
|-------------------------------|--------------------------------|-------------------------|-------|----------------|----------------|
| 5-CQA                         | $Y=0.94x+0.022$                | 10-5000                 | 0.991 | 4.5            | 10.0           |
| 3-CQA                         | $Y=1.10x+0.022$                | 10-5000                 | 0.996 | 3.0            | 10.0           |
| 4-CQA                         | $Y=0.60x+0.006$                | 20-5000                 | 0.991 | 9.0            | 20.0           |
| 4-CDOA                        | $Y=0.30x-0.007$                | 25-10000                | 0.992 | 4.5            | 25.0           |
| Caffeic acid                  | $Y=0.73x+0.028$                | 10-5000                 | 0.991 | 6.0            | 10.0           |
| 1,3-diCQA                     | $Y=0.79x+0.015$                | 10-5000                 | 0.993 | 3.0            | 10.0           |
| Scutellarin                   | $Y=0.75x+0.040$                | 25-5000                 | 0.991 | 9.0            | 25.0           |
| 3,4-diCQA                     | $Y=0.25x+0.046$                | 40-10000                | 0.992 | 22.5           | 40.0           |
| 3,5-diCQA                     | $Y=0.34x+0.038$                | 40-10000                | 0.990 | 21.0           | 40.0           |
| Erigoster B                   | $Y=3.78x+0.46$                 | 20-5000                 | 0.991 | 10.0           | 20.0           |
| 3,4-diCDOA (or<br>4,9-diCDOA) | $Y=4.17x+0.31$                 | 30-5000                 | 0.998 | 17.4           | 30.0           |
| A-7-O-G                       | $Y=0.57x+0.026$                | 25-5000                 | 0.990 | 14.4           | 25.0           |
| 4,5-diCQA                     | $Y=0.33x+0.093$                | 50-10000                | 0.993 | 14.4           | 50.0           |

**Table S2** The precision and accuracy of thirteen compounds in rat plasma

| Analyte                       | Concentration<br>(ng/mL) | Intra-day<br>(n=5)  |            |                     | Inter-day<br>(n=5)  |            |                     |
|-------------------------------|--------------------------|---------------------|------------|---------------------|---------------------|------------|---------------------|
|                               |                          | Detected<br>(ng/mL) | RSD<br>(%) | Accuracy<br>(RE, %) | Detected<br>(ng/mL) | RSD<br>(%) | Accuracy<br>(RE, %) |
| 5-CQA                         | 30                       | 28.70±1.81          | 6.30       | -4.33               | 31.14±2.11          | 6.78       | 3.79                |
|                               | 400                      | 420.87±17.72        | 4.21       | 5.22                | 432.29±10.49        | 2.43       | 8.07                |
|                               | 4000                     | 3601.01±187.07      | 5.19       | -9.97               | 3712.10±103.10      | 2.78       | -7.20               |
| 3-CQA                         | 30                       | 30.15±1.68          | 5.58       | 0.49                | 29.92±0.53          | 1.78       | -0.26               |
|                               | 400                      | 414.90±13.35        | 3.22       | 3.72                | 404.42±9.20         | 2.28       | 1.11                |
|                               | 4000                     | 3793.00±250.50      | 6.60       | -5.18               | 3705.02±86.70       | 2.34       | -7.37               |
| 4-CQA                         | 30                       | 30.55±3.06          | 10.01      | 1.85                | 29.09±1.85          | 6.35       | -3.05               |
|                               | 400                      | 415.14±21.05        | 5.07       | 3.78                | 421.31±14.31        | 3.40       | 5.33                |
|                               | 4000                     | 3776.69±224.45      | 5.94       | -5.58               | 3899.84±107.84      | 2.77       | -2.50               |
| 4-CDOA                        | 60                       | 59.45±1.78          | 3.00       | -0.92               | 56.01±3.40          | 6.06       | -6.65               |
|                               | 800                      | 839.93±22.54        | 2.68       | 4.99                | 805.60±31.05        | 3.85       | 0.70                |
|                               | 8000                     | 7502.89±194.99      | 2.60       | -6.21               | 7193.98±286.14      | 3.98       | -10.08              |
| Caffeic acid                  | 30                       | 28.85±2.01          | 6.95       | -3.82               | 28.29±2.02          | 7.12       | -5.71               |
|                               | 400                      | 456.20±17.10        | 3.75       | 14.05               | 441.12±20.55        | 4.66       | 10.28               |
|                               | 4000                     | 3434.55±84.68       | 2.47       | -14.14              | 3415.81±169.20      | 4.95       | -14.60              |
| 1,3-diCQA                     | 30                       | 26.18±1.59          | 6.07       | -12.72              | 26.74±0.98          | 3.66       | -10.87              |
|                               | 400                      | 432.77±17.49        | 4.04       | 8.19                | 427.57±9.23         | 2.16       | 6.89                |
|                               | 4000                     | 3667.19±244.70      | 6.67       | -8.32               | 3646.61±46.49       | 1.28       | -8.83               |
| Scutellarin                   | 30                       | 28.48±2.41          | 8.45       | -5.08               | 26.16±2.83          | 10.82      | -12.81              |
|                               | 400                      | 449.39±22.80        | 5.07       | 12.35               | 418.88±30.43        | 7.26       | 4.72                |
|                               | 4000                     | 3643.74±170.83      | 4.69       | -8.91               | 3497.72±139.62      | 3.99       | -12.56              |
| 3,4-diCQA                     | 60                       | 60.66±5.02          | 8.28       | 1.10                | 61.75±1.80          | 2.92       | 2.91                |
|                               | 800                      | 761.89±15.04        | 1.97       | -4.76               | 754.98±9.47         | 1.25       | -5.63               |
|                               | 8000                     | 7321.91±324.00      | 4.43       | -8.48               | 7308.01±235.05      | 3.22       | -8.65               |
| 3,5-diCQA                     | 60                       | 63.77±4.49          | 7.04       | 6.29                | 65.95±2.18          | 3.31       | 9.91                |
|                               | 800                      | 681.46±18.91        | 2.77       | -14.82              | 692.46±52.90        | 7.64       | -13.44              |
|                               | 8000                     | 6809.79±252.09      | 3.70       | -14.88              | 6828.27±232.50      | 3.41       | -14.65              |
| Erigeron B                    | 30                       | 30.92±1.92          | 6.22       | 3.06                | 32.33±1.71          | 5.29       | 7.76                |
|                               | 400                      | 345.75±14.73        | 4.26       | -13.56              | 353.67±32.67        | 9.24       | -11.58              |
|                               | 4000                     | 3377.90±151.63      | 4.49       | -15.55              | 3647.97±277.18      | 7.60       | -8.80               |
| 3,4-diCDOA (or<br>4,9-diCDOA) | 30                       | 30.09±2.25          | 7.48       | 0.30                | 29.72±0.43          | 1.43       | -0.93               |
|                               | 400                      | 399.42±11.74        | 2.94       | -0.14               | 410.42±15.66        | 3.82       | 2.60                |
|                               | 4000                     | 4423.50±357.98      | 8.09       | 10.59               | 4448.60±103.76      | 2.33       | 11.22               |
| A-7-O-G                       | 30                       | 27.84±2.08          | 7.49       | -7.21               | 28.21±1.27          | 4.49       | -5.98               |
|                               | 400                      | 454.20±18.77        | 4.13       | 13.55               | 451.13±10.98        | 2.43       | 12.78               |
|                               | 4000                     | 3402.58±88.68       | 2.61       | -14.94              | 3379.51±21.52       | 0.64       | -15.51              |

|           |      |                |      |        |                |      |        |
|-----------|------|----------------|------|--------|----------------|------|--------|
| 4,5-diCQA | 60   | 65.99±2.68     | 4.06 | 9.98   | 65.64±1.04     | 1.58 | 9.40   |
|           | 800  | 703.54±47.91   | 6.81 | -12.06 | 698.01±49.98   | 7.16 | -12.75 |
|           | 8000 | 8553.69±331.69 | 3.88 | 6.92   | 8785.63±273.50 | 3.11 | 9.82   |

---

**Table S3** The extraction recovery and matrix effect of thirteen compounds in rat plasma

| Analyte                       | Concentration<br>(ng/mL) | Extraction recovery(n=5) |            | Matrix effect(n=5) |            |
|-------------------------------|--------------------------|--------------------------|------------|--------------------|------------|
|                               |                          | Mean± SD (%)             | RSD<br>(%) | Mean±SD (%)        | RSD<br>(%) |
| 5-CQA                         | 30                       | 112.66±7.38              | 6.55       | 131.42±4.94        | 3.76       |
|                               | 400                      | 109.55±6.17              | 5.63       | 128.38±4.13        | 3.21       |
|                               | 4000                     | 103.87±5.23              | 5.04       | 101.66±3.02        | 2.97       |
| 3-CQA                         | 30                       | 100.83±7.46              | 7.40       | 111.68±7.88        | 7.05       |
|                               | 400                      | 107.86±4.32              | 4.01       | 101.7±2.57         | 2.53       |
|                               | 4000                     | 99.98±4.41               | 4.41       | 98.2±3.85          | 3.93       |
| 4-CQA                         | 30                       | 102.50±8.29              | 8.09       | 97.76±7.09         | 7.25       |
|                               | 400                      | 103.42±7.00              | 6.77       | 98.55±2.91         | 2.96       |
|                               | 4000                     | 104.67±6.96              | 6.65       | 92.23±4.35         | 4.71       |
| 4-CDOA                        | 60                       | 109.44±7.30              | 6.67       | 96.06±6.70         | 6.98       |
|                               | 800                      | 95.65±4.05               | 4.23       | 99.07±2.32         | 2.34       |
|                               | 8000                     | 93.92±2.37               | 2.53       | 97.54±4.16         | 4.26       |
| Caffeic acid                  | 30                       | 102.6±9.36               | 9.12       | 66.11±5.05         | 7.63       |
|                               | 400                      | 94.07±4.13               | 4.39       | 82.7±1.31          | 1.59       |
|                               | 4000                     | 89.30±4.60               | 5.15       | 80.64±4.86         | 6.03       |
| 1,3-diCQA                     | 30                       | 96.15±6.32               | 6.58       | 92.46±4.89         | 5.29       |
|                               | 400                      | 96.47±4.96               | 5.14       | 97.64±4.86         | 4.98       |
|                               | 4000                     | 95.11±4.53               | 4.76       | 97.25±5.15         | 5.29       |
| Scutellarin                   | 30                       | 88.46±7.55               | 8.53       | 147.69±13.56       | 9.18       |
|                               | 400                      | 86.33±7.35               | 8.52       | 107.33±10.47       | 9.76       |
|                               | 4000                     | 79.60±6.59               | 8.27       | 86.59±5.96         | 6.89       |
| 3,4-diCQA                     | 60                       | 91.58±9.45               | 10.32      | 104.63±4.37        | 4.18       |
|                               | 800                      | 99.39±1.83               | 1.85       | 101.17±2.09        | 2.06       |
|                               | 8000                     | 103.1±6.27               | 6.08       | 100.86±3.16        | 3.13       |
| 3,5-diCQA                     | 60                       | 91.75±4.80               | 5.23       | 80.09±5.81         | 7.26       |
|                               | 800                      | 98.95±3.43               | 3.46       | 96.37±5.57         | 5.78       |
|                               | 8000                     | 97.98±3.77               | 3.85       | 88.44±3.03         | 3.43       |
| Erigeron B                    | 30                       | 99.85±8.96               | 8.97       | 102.52±7.51        | 7.32       |
|                               | 400                      | 95.40±5.73               | 6.01       | 95.51±5.26         | 5.51       |
|                               | 4000                     | 82.73±7.56               | 9.14       | 90.54±8.24         | 9.10       |
| 3,4-diCDOA (or<br>4,9-diCDOA) | 30                       | 101.43±6.88              | 6.78       | 93.41±8.11         | 8.68       |
|                               | 400                      | 101.24±5.59              | 5.52       | 102.67±3.31        | 3.23       |
|                               | 4000                     | 98.96±5.99               | 6.05       | 109.68±5.38        | 4.91       |
| A-7-O-G                       | 30                       | 107.25±3.02              | 2.82       | 92.39±10.54        | 11.40      |
|                               | 400                      | 105.71±6.10              | 5.77       | 94.74±2.84         | 3.00       |
|                               | 4000                     | 105.82±6.02              | 5.69       | 95.79±3.18         | 3.32       |
| 4,5-diCQA                     | 60                       | 109.31±3.69              | 3.37       | 86.65±6.12         | 7.06       |

|      |             |      |             |      |
|------|-------------|------|-------------|------|
| 800  | 104.39±4.63 | 4.43 | 97.03±5.04  | 5.19 |
| 8000 | 98.06±6.22  | 6.35 | 102.91±6.76 | 6.57 |

---

**Table S4** The stability of thirteen compounds in rat plasma

| Analyte                       | Spiked<br>(ng/ml) | 12 h in auto-sampler |       | Short-term stability<br>(4°C, 12 h) |       | Freeze-thaw stability<br>(three cycles) |       | Long-term stability<br>(-80°C,30 days) |       |
|-------------------------------|-------------------|----------------------|-------|-------------------------------------|-------|-----------------------------------------|-------|----------------------------------------|-------|
|                               |                   | RE                   | RSD   | RE                                  | RSD   | RE                                      | RSD   | RE                                     | RSD   |
|                               |                   | (%)                  | (%)   | (%)                                 | (%)   | (%)                                     | (%)   | (%)                                    | (%)   |
| 5-CQA                         | 30                | 8.23                 | 3.42  | -2.69                               | 6.03  | 9.98                                    | 5.67  | 6.16                                   | 5.25  |
|                               | 400               | 1.10                 | 2.28  | -2.49                               | 7.99  | 12.95                                   | 7.93  | 0.59                                   | 7.58  |
|                               | 4000              | -10.00               | 4.11  | -0.92                               | 4.47  | 8.62                                    | 3.69  | -1.38                                  | 1.92  |
| 3-CQA                         | 30                | -0.03                | 8.23  | -1.64                               | 7.65  | -8.45                                   | 3.88  | -5.73                                  | 3.36  |
|                               | 400               | -1.62                | 2.88  | 9.94                                | 4.05  | -0.36                                   | 7.74  | -9.98                                  | 3.60  |
|                               | 4000              | -15.40               | 2.88  | -10.45                              | 4.77  | 1.19                                    | 4.34  | -7.33                                  | 4.88  |
| 4-CQA                         | 30                | -5.73                | 5.74  | 0.52                                | 5.38  | -7.25                                   | 6.19  | 10.24                                  | 10.19 |
|                               | 400               | -13.68               | 4.03  | 12.56                               | 3.60  | -1.14                                   | 5.14  | -9.05                                  | 4.76  |
|                               | 4000              | -14.96               | 3.28  | 0.37                                | 4.28  | 2.02                                    | 3.72  | -1.94                                  | 3.00  |
| 4-CDOA                        | 60                | -5.16                | 6.43  | 3.56                                | 6.21  | -12.60                                  | 7.47  | 3.05                                   | 8.33  |
|                               | 800               | -4.05                | 2.34  | 11.57                               | 7.40  | 3.53                                    | 2.37  | 14.17                                  | 3.37  |
|                               | 8000              | -11.71               | 2.54  | -2.68                               | 2.07  | 1.83                                    | 3.15  | 12.26                                  | 10.88 |
| Caffeic acid                  | 30                | -18.11               | 6.16  | -0.20                               | 6.58  | -2.14                                   | 9.95  | -9.71                                  | 10.57 |
|                               | 400               | 5.18                 | 2.51  | 13.81                               | 8.66  | 11.51                                   | 7.01  | 15.21                                  | 5.10  |
|                               | 4000              | -13.69               | 5.88  | 9.04                                | 5.26  | 5.57                                    | 5.03  | 0.56                                   | 4.38  |
| 1,3-diCQA                     | 30                | -5.24                | 7.61  | 0.49                                | 6.74  | -0.45                                   | 10.81 | -10.61                                 | 8.04  |
|                               | 400               | -1.49                | 4.13  | 4.57                                | 5.85  | 2.78                                    | 4.45  | 3.20                                   | 4.45  |
|                               | 4000              | -15.44               | 1.21  | 5.49                                | 1.26  | -5.43                                   | 4.81  | -6.30                                  | 4.05  |
| Scutellarin                   | 30                | -20.45               | 8.81  | 20.30                               | 9.70  | -7.17                                   | 15.82 | -11.75                                 | 19.20 |
|                               | 400               | 0.37                 | 2.42  | 9.11                                | 7.56  | 2.09                                    | 4.37  | -1.05                                  | 4.74  |
|                               | 4000              | -15.53               | 6.55  | 5.81                                | 2.31  | -8.97                                   | 3.10  | -8.45                                  | 3.27  |
| 3,4-diCQA                     | 60                | 1.38                 | 10.06 | 6.01                                | 7.41  | 3.85                                    | 6.48  | -8.41                                  | 4.83  |
|                               | 800               | -3.71                | 2.67  | 14.95                               | 3.58  | -10.36                                  | 2.57  | 6.78                                   | 2.52  |
|                               | 8000              | -11.03               | 4.62  | 5.43                                | 3.16  | 5.78                                    | 2.03  | 7.83                                   | 3.38  |
| 3,5-diCQA                     | 60                | 6.78                 | 7.81  | -10.10                              | 7.17  | -0.15                                   | 6.14  | 13.28                                  | 3.39  |
|                               | 800               | -14.89               | 4.70  | 5.58                                | 14.35 | -15.29                                  | 3.02  | -5.89                                  | 2.75  |
|                               | 8000              | -13.39               | 6.67  | 11.47                               | 2.21  | 4.18                                    | 3.17  | 12.76                                  | 3.77  |
| Erigoster B                   | 30                | 0.94                 | 10.33 | -5.94                               | 13.29 | 1.04                                    | 14.51 | -3.28                                  | 9.08  |
|                               | 400               | 10.32                | 1.69  | -2.16                               | 8.70  | -12.19                                  | 7.95  | -10.72                                 | 4.78  |
|                               | 4000              | 0.27                 | 10.89 | 17.67                               | 2.23  | 11.09                                   | 11.92 | 11.78                                  | 3.04  |
| 3,4-diCDOA (or<br>4,9-diCDOA) | 30                | 14.41                | 9.49  | -15.87                              | 15.30 | -7.38                                   | 12.31 | 3.89                                   | 6.92  |
|                               | 400               | -7.72                | 5.80  | 14.40                               | 9.36  | -14.91                                  | 12.75 | 2.18                                   | 2.62  |
|                               | 4000              | -9.28                | 5.20  | 12.75                               | 2.85  | -1.04                                   | 8.25  | 10.75                                  | 3.73  |
| A-7-O-G                       | 30                | -8.10                | 5.17  | 12.23                               | 9.05  | 9.66                                    | 5.67  | -0.34                                  | 8.40  |
|                               | 400               | 13.11                | 3.34  | 14.84                               | 5.25  | 15.27                                   | 10.10 | 14.12                                  | 5.67  |

|           |      |        |      |       |      |       |      |        |      |
|-----------|------|--------|------|-------|------|-------|------|--------|------|
| 4,5-diCQA | 4000 | -14.03 | 3.00 | 1.34  | 3.96 | -0.44 | 3.02 | -12.00 | 2.82 |
|           | 60   | -5.75  | 4.95 | 2.79  | 6.81 | -3.70 | 9.55 | 5.86   | 8.28 |
|           | 800  | -7.96  | 3.50 | 13.96 | 4.16 | -5.30 | 5.07 | 7.74   | 5.04 |
|           | 8000 | 13.07  | 1.55 | 4.37  | 4.58 | -7.70 | 1.64 | 2.12   | 3.27 |

---



**Table S5** Fifteen compounds identified from EBI by LC-Q-TOF-MS

| No. | $t_R$<br>(min) | (-)ESI-MS $m/z$ |            |             | Formula                | Identification                          |
|-----|----------------|-----------------|------------|-------------|------------------------|-----------------------------------------|
|     |                | Observed        | Calculated | Error (ppm) |                        |                                         |
| 1   | 8.873          | 353.0848        | 353.0878   | 8.41        | $C_{16}H_{17}O_9^-$    | 5-CQA <sup>a</sup>                      |
| 2   | 11.816         | 381.0800        | 381.0827   | 7.04        | $C_{17}H_{17}O_{10}^-$ | 3-CDOA                                  |
| 3   | 12.201         | 353.0854        | 353.0878   | 6.71        | $C_{16}H_{17}O_9^-$    | 3-CQA <sup>a</sup>                      |
| 4   | 13.038         | 353.0859        | 353.0878   | 5.44        | $C_{16}H_{17}O_9^-$    | 4-CQA <sup>a</sup>                      |
| 5   | 13.954         | 381.0807        | 381.0827   | 5.31        | $C_{17}H_{17}O_{10}^-$ | 4-CDOA <sup>a</sup>                     |
| 6   | 14.565         | 179.0338        | 179.0350   | 6.72        | $C_9H_7O_4^-$          | Caffeic acid <sup>a</sup>               |
| 7   | 15.321         | 381.0812        | 381.0827   | 4.02        | $C_{17}H_{17}O_{10}^-$ | 9-CDOA                                  |
| 8   | 16.093         | 515.1165        | 515.1195   | 5.77        | $C_{25}H_{23}O_{12}^-$ | 1,3-diCQA <sup>a</sup>                  |
| 9   | 22.365         | 461.0709        | 461.0731   | 3.53        | $C_{21}H_{17}O_{12}^-$ | Scutellarin <sup>a</sup>                |
| 10  | 24.327         | 515.1154        | 515.1195   | 8.03        | $C_{25}H_{23}O_{12}^-$ | 3,4-diCQA <sup>a</sup>                  |
| 11  | 25.082         | 543.1107        | 543.1144   | 6.96        | $C_{26}H_{23}O_{13}^-$ | Erigoster B <sup>a</sup>                |
| 12  | 25.436         | 515.1153        | 515.1195   | 8.1         | $C_{25}H_{23}O_{12}^-$ | 3,5-diCQA <sup>a</sup>                  |
| 13  | 26.369         | 543.1106        | 543.1144   | 7.02        | $C_{26}H_{23}O_{13}^-$ | 3,4-diCDOA (or 4,9-diCDOA) <sup>a</sup> |
| 14  | 27.672         | 445.0750        | 445.0776   | 5.87        | $C_{21}H_{17}O_{11}^-$ | A-7-O-G <sup>a</sup>                    |
| 15  | 28.395         | 515.1166        | 515.1195   | 5.68        | $C_{25}H_{23}O_{12}^-$ | 4,5-diCQA <sup>a</sup>                  |

<sup>a</sup> compared with reference compounds.

**Table S6** Fifteen compounds identified from EBI by LC-ESI-MS/MS

| No. | t <sub>R</sub> (min) | (-) ESI               | LC/(-)ESI-MS <sup>n</sup> <i>m/z</i> (% base peak)                                                      | Identification                |
|-----|----------------------|-----------------------|---------------------------------------------------------------------------------------------------------|-------------------------------|
| 1   | 8.873                | 353[M-H] <sup>-</sup> | MS <sup>2</sup> [353]:191(100),179(35),173(12),161(10),<br>135(65),127(10),85(9)                        | 5-CQA                         |
| 2   | 11.816               | 381[M-H] <sup>-</sup> | MS <sup>2</sup> [381]:293(15),251(7),179(36),161(100),<br>135(40),133(60)                               | 3-CDOA                        |
| 3   | 12.201               | 353[M-H] <sup>-</sup> | MS <sup>2</sup> [353]:191(100),179(2),173(7),161(1),<br>155(1),135(20),93(4),85(8)                      | 3-CQA                         |
| 4   | 13.038               | 353[M-H] <sup>-</sup> | MS <sup>2</sup> [353]:191(100),179(80),173(70),161(30),<br>155(14),135(35),127(17),111(22),93(14),85(8) | 4-CQA                         |
| 5   | 13.954               | 381[M-H] <sup>-</sup> | MS <sup>2</sup> [381]:293(7),251(13),203(10),179(18),<br>161(100),135(35),133(55)                       | 4-CDOA                        |
| 6   | 14.565               | 179[M-H] <sup>-</sup> | MS <sup>2</sup> [179]:135(100)                                                                          | Caffeic acid                  |
| 7   | 15.321               | 381[M-H] <sup>-</sup> | MS <sup>2</sup> [381]:219(20),179(30),161(100),<br>135(20), 133(20)                                     | 9-CDOA                        |
| 8   | 16.093               | 515[M-H] <sup>-</sup> | MS <sup>2</sup> [515]:353(43),335(20),191(100),179(90),<br>173(42),135(20)                              | 1,3-diCQA                     |
| 9   | 22.365               | 461[M-H] <sup>-</sup> | MS <sup>2</sup> [461]:285(100),267(2),257(3),241(2),<br>213(2),175(2)                                   | Scutellarin                   |
| 10  | 24.327               | 515[M-H] <sup>-</sup> | MS <sup>2</sup> [515]:353(37),335(40),255(5),191(29),<br>179(100),173(95),155(20),135(10)               | 3,4-diCQA                     |
| 11  | 25.082               | 543[M-H] <sup>-</sup> | MS <sup>2</sup> [543]:381(100),363(20),293(20),251(18),<br>203(14),179(100),161(14),135(10),129(24)     | Erigoster B                   |
| 12  | 25.436               | 515[M-H] <sup>-</sup> | MS <sup>2</sup> [515]:353(100),335(20),191(97),173(50)                                                  | 3,5-diCQA                     |
| 13  | 26.369               | 543[M-H] <sup>-</sup> | MS <sup>2</sup> [543]:381(100),363(50),251(25),221(65),<br>203(50),179(50),161(51),135(26),129(50)      | 3,4-diCDOA (or<br>4,9-diCDOA) |
| 14  | 27.672               | 445[M-H] <sup>-</sup> | MS <sup>2</sup> [445]:269(100),225(15)                                                                  | A -7- <i>O</i> -G             |
| 15  | 28.395               | 515[M-H] <sup>-</sup> | MS <sup>2</sup> [515]:353(100),335(34),191(90),179(75),<br>173(17),135(26)                              | 4,5-diCQA                     |

**Table S7** Assay results for EBI of different batches (Mean±SD, n=3)□

| Analyte                       | Content (µg/mL) |             |             |             |             |
|-------------------------------|-----------------|-------------|-------------|-------------|-------------|
|                               | 20150246        | 20150940    | 20160143    | 20160347    | 20160435    |
| 5-CQA                         | 83.75±0.64      | 80.25±0.80  | 58.29±0.93  | 60.78±0.67  | 76.86±1.09  |
| 3-CQA                         | 56.51±0.23      | 54.82±0.56  | 40.24±0.70  | 42.62±0.46  | 52.31±0.49  |
| 4-CQA                         | 63.93±1.08      | 61.53±0.48  | 46.11±0.31  | 49.42±1.62  | 59.40±0.99  |
| 4-CDOA                        | 60.82±1.08      | 81.13±0.70  | 101.53±0.33 | 85.94±2.04  | 75.99±0.93  |
| Caffeic acid                  | 16.89±0.15      | 63.44±0.35  | 42.85±0.76  | 45.37±0.71  | 49.15±0.21  |
| 1,3-diCQA                     | 8.31±0.07       | 8.26±0.17   | 4.31±0.06   | 5.32±0.13   | 7.13±0.25   |
| Scutellarin                   | 325.93±4.70     | 495.99±2.06 | 395.80±2.88 | 433.36±1.33 | 403.55±1.00 |
| 3,4-diCQA                     | 43.17±0.69      | 113.67±1.06 | 64.73±0.66  | 97.36±1.44  | 82.84±1.30  |
| 3,5-diCQA                     | 40.73±0.14      | 82.15±0.88  | 51.18±0.29  | 76.33±0.26  | 66.65±0.97  |
| Erigeron B                    | 38.96±0.41      | 158.17±1.56 | 149.22±1.31 | 193.27±0.81 | 105.72±0.63 |
| 3,4-diCDOA (or<br>4,9-diCDOA) | 5.99±0.13       | 114.27±0.77 | 58.34±1.35  | 106.75±2.03 | 51.89±0.79  |
| A-7-O-G                       | 163.84±0.73     | 255.39±0.97 | 107.18±0.94 | 83.92±0.44  | 179.53±0.35 |
| 4,5-diCQA                     | 136.11±0.21     | 326.95±0.64 | 189.05±1.80 | 250.78±0.51 | 225.60±0.48 |
| Total                         | 1044.94         | 1896.02     | 1308.83     | 1531.22     | 1436.62     |

the fifth day

the seventh day

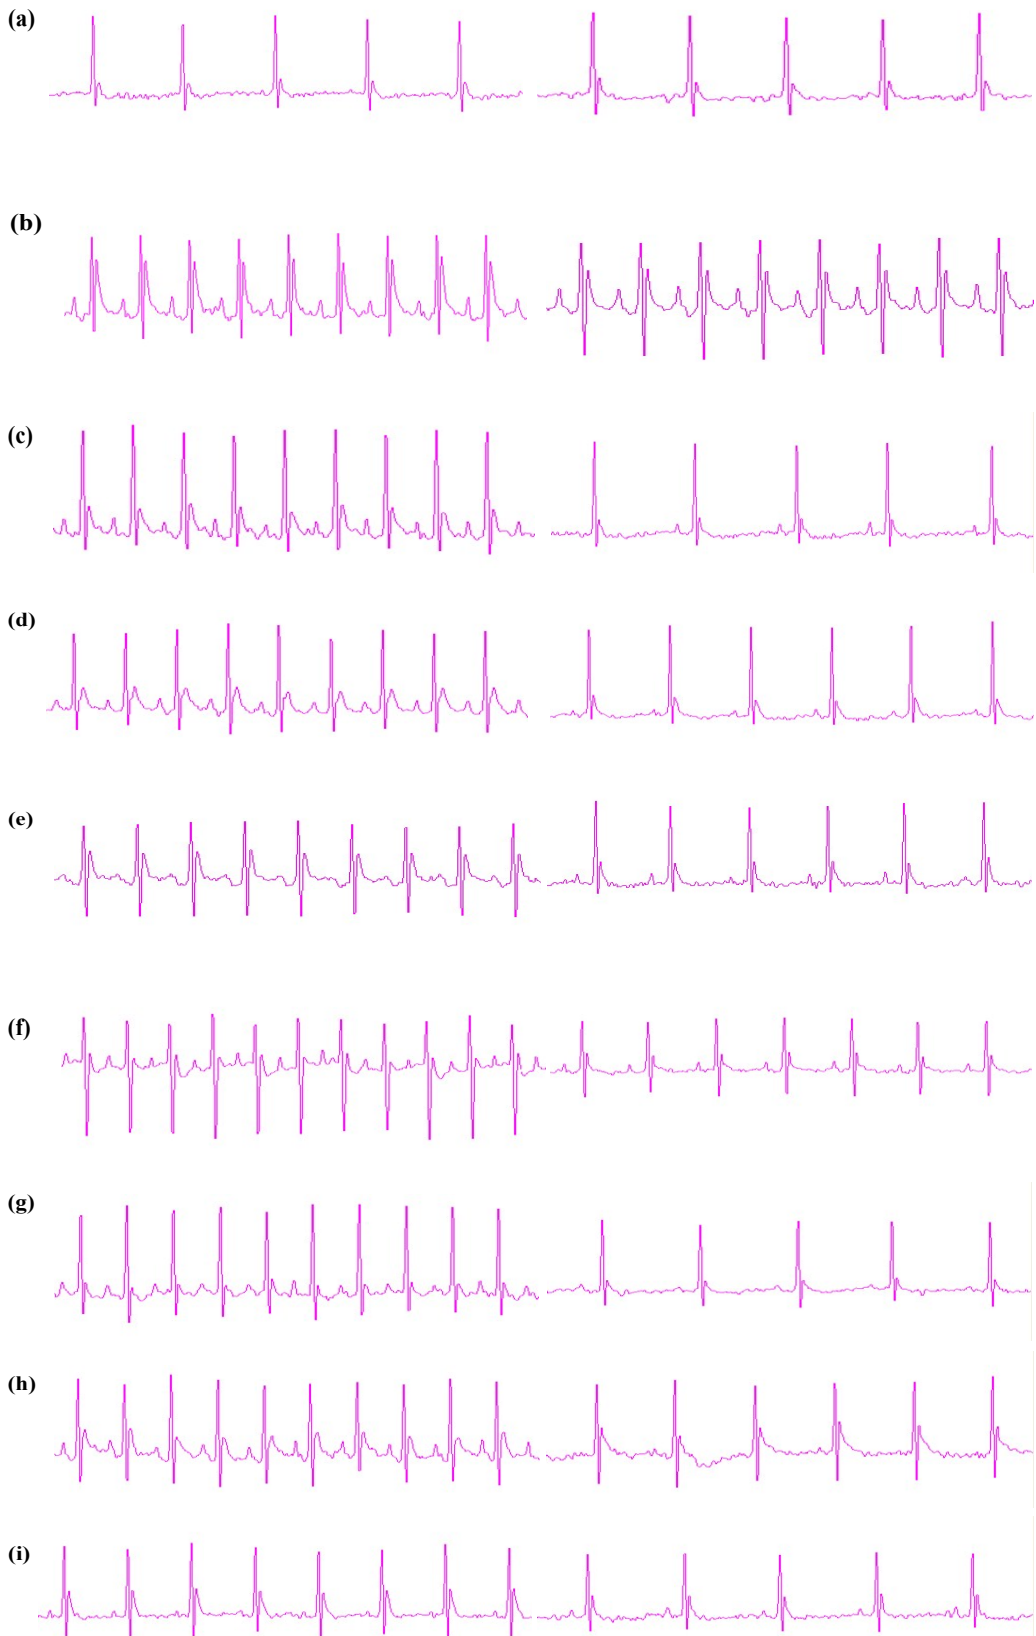

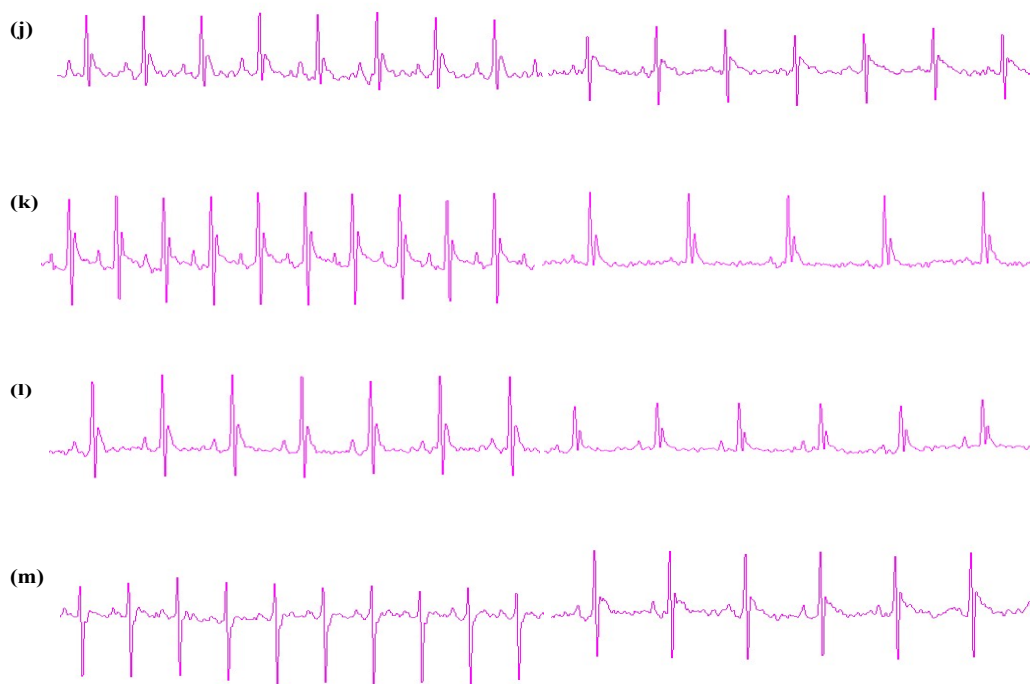

**Fig. S1** The electrocardiograms (ECGs) of each group on the fifth and seventh day of the trial. (a) control group, (b) model group, (c) EBI group, (d) Scutellarin group, (e) Caffeic acid group, (f) 3-CQA group, (g) A-7-O-G group, (h)5-CQA group, (i) 4-CQA group, (j) 4,5-diCQA group, (k) 3,5-diCQA group, (l) 3,4-diCQA group, and (m) 1,3-diCQA group.

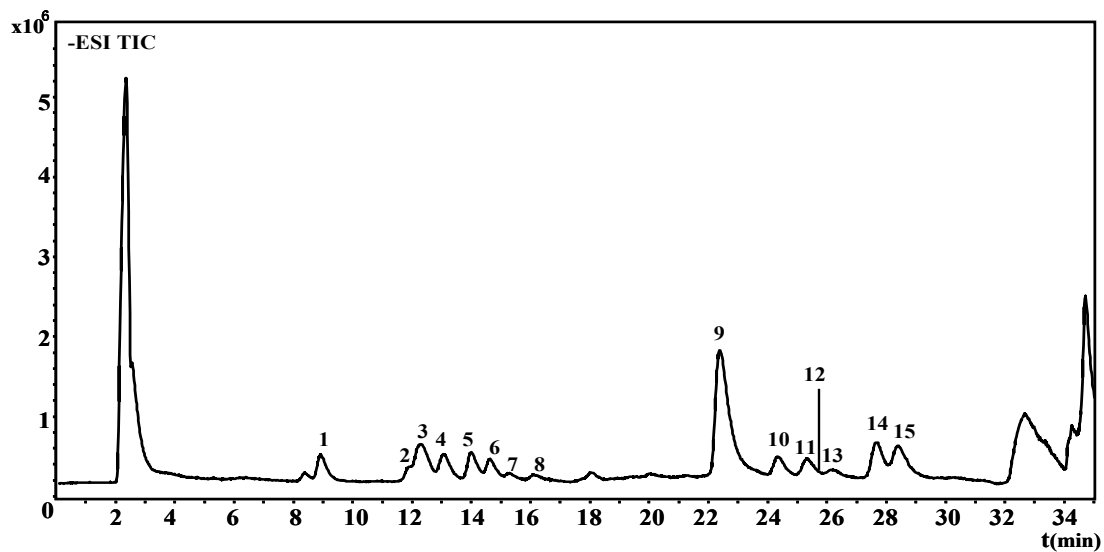

**Fig. S2** LC-Q-TOF-MS total ion current (TIC) chromatogram in negative mode of EBI (peak 1, 5-CQA; peak 2, 3-CDOA; peak 3, 3-CQA; peak 4, 4-CQA; peak 5, 4-CDOA; peak 6, caffeic acid; peak 7, 9-CDOA; peak 8, 1,3-diCQA; peak 9, scutellarin; peak 10, 3,4-diCQA; peak 11, erigoster B; peak 12, 3,5-diCQA; peak 13, 3,4-diCDOA (or 4,9-diCDOA); peak 14, A-7-O-G; peak 15, 4,5-diCQA).
